# Supplementary material
Source: HighWire-hosted journal article supplement (https://bmjopenquality.bmj.com/highwire/filestream/136096/field_highwire_adjunct_files/0/ds1985.xlsx)
Supplement: ds1985.xlsx [file ds1985.xlsx]

## Sheet: Sheet1
		Discharges May 5th-11th		Discharges May 5th-11th	Discharges May 5th-11th
Ward	Ward group	Baseline TTOs transm < 24 hrs	Baseline TTOs not sent < 24 hours	Baseline % sent <24 hr	Baseline Grand Total
DAY SURGERY UNIT (Ashford)	Day Surgery	0	118	0	118
DAY SURGERY UNIT (ST PETER'S)	Day Surgery	0	61	0	61
EYE WARD	Day Surgery	0	58	0	58
ASPEN WARD	Medical	2	3	0.4	5
BIRCH WARD	Medical	0	9	0	9
CARD	Medical	0	31	0	31
CEDAR WARD	Medical	0	11	0	11
CHAUCER	Medical	0	3	0	3
CHSP.	Medical	0	0	0	0
CORONARY CARE	Medical	0	21	0	21
DICKENS	Medical	0	27	0	27
DISCHARGE LOUNGE (St Peter's)	Medical	17	55	0.236111	72
FIELDING	Medical	0	5	0	5
HAEM/ONCOLOGY DAY UNIT (SPH)	Medical	41	12	0.773585	53
HOLLY WARD	Medical	2	6	0.25	8
Infusion Suite - Ashford	Medical	10	6	0.625	16
MAPLE WARD	Medical	3	11	0.214286	14
MAUV.	Medical	0	0	0	0
MAY WARD	Medical	2	9	0.181818	11
MEDICAL ASSESSMENT UNIT	Medical	2	44	0.0434783	46
MEDICAL HIGH DEPENDENCY UNIT	Medical	0	2	0	2
Medical Short Stay Unit	Medical	14	15	0.482759	29
SWIFT WARD	Medical	0	4	0	4
WORDSWORTH	Medical	0	5	0	5
ADMISSIONS LOUNGE (SPH)	Others	0	0	0	0
ASH WARD	Others	0	61	0	61
CLINICAL DECISION UNIT	Others	2	42	0.0454545	44
ENDOSCOPY	Others	0	120	0	120
INTENSIVE THERAPY (St Peter's)	Others	0	4	0	4
Interventional Suite (XRAY)	Others	0	0	0	0
NEONATAL INTENSIVE CARE UNIT	Others	0	6	0	6
OAK WARD	Others	0	41	0	41
PAU.	Others	0	0	0	0
SPECIAL CARE UNIT (JB)	Others	0	5	0	5
UCLH	Others	0	0	0	0
JOAN BOOKER WARD	Others	0	73	0	73
LABOUR WARD	Others	0	15	0	15
FALCON WARD	Surgery	0	30	0	30
HERON WARD	Surgery	2	8	0.2	10
KINGFISHER WARD	Surgery	1	47	0.0208333	48
MAXILLO-FACIAL SUITE	Surgery	0	5	0	5
MAXILLO-FACIAL SUITE ASHFORD	Surgery	0	5	0	5
SAUV.	Surgery	0	0	0	0
SURGICAL ASSESSMENT UNIT (DW)	Surgery	1	34	0.0285714	35
Swan	Surgery	3	16	0.157895	19
Theatre Ward (SPH)	Surgery	0	2	0	2
UROLOGY TREATMENT AREA (ASH)	Surgery	0	1	0	1
Grand Total		102	913	0.100493	1015
